# Supplementary material
Source: PubMed Central journal article supplement (PMC3998515)
Supplement: la5002573_si_001.pdf [file la5002573_si_001.pdf]

The cell wall composition of *Bacillus subtilis*  
changes as a function of pH and Zn<sup>2+</sup> exposure –  
insights from cryo-XPS measurements

*Madeleine Ramstedt\*, Laura Leone, Per Persson, Andrey Shchukarev*

Department of Chemistry, Umeå University, 90187 Umeå, Sweden

Supporting material

## Supplemental figures

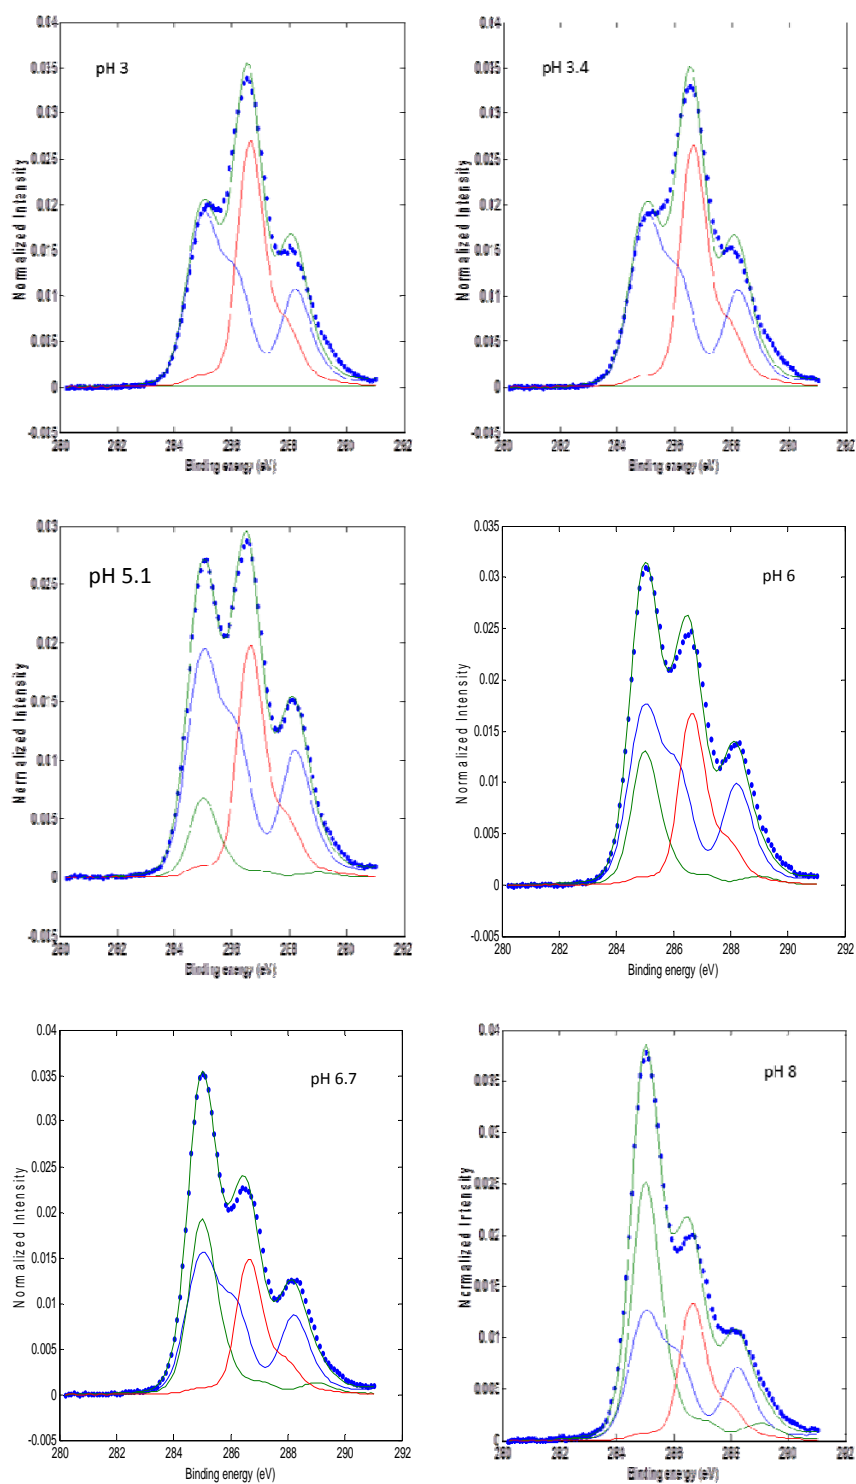

**Supplementary figure 1.** The fit of the multivariate model (solid line) to the C 1s spectra (dotted line) at different pH-values in figure 4a) Blue represents peptide, red represents

sugar (teichoic and teichuronic acids) and green represents lipid (lipoteichoic acids) component in the spectra. (Please note that the binding energy scale is in increasing eV)

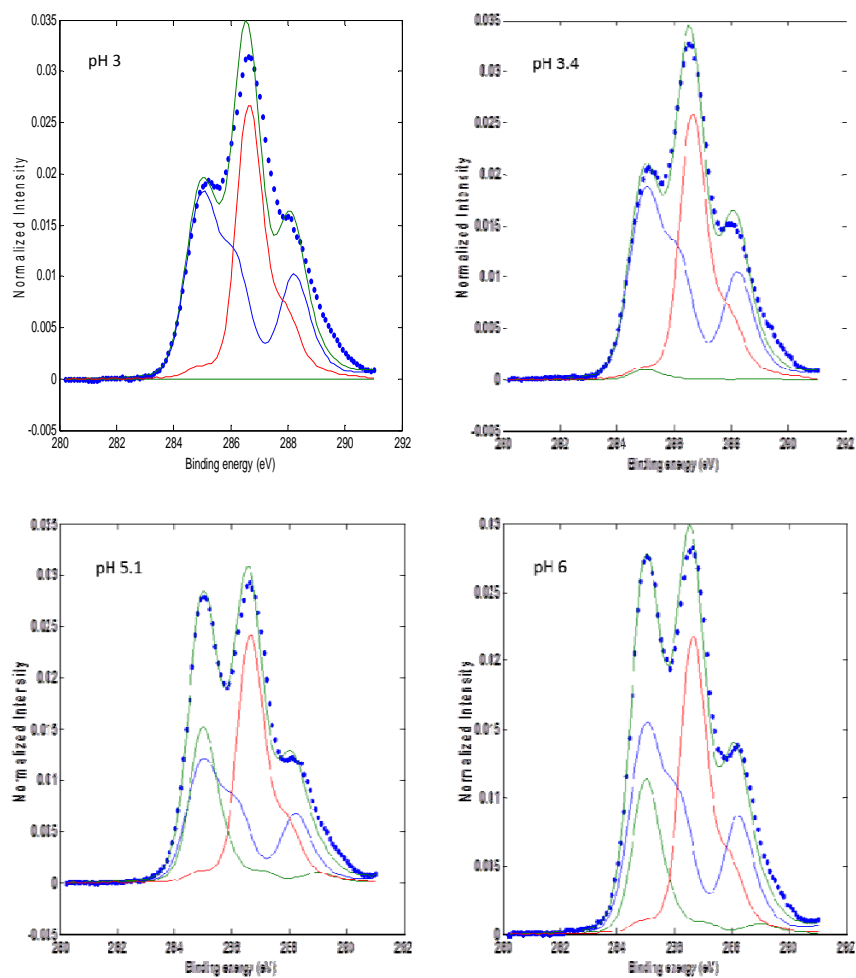

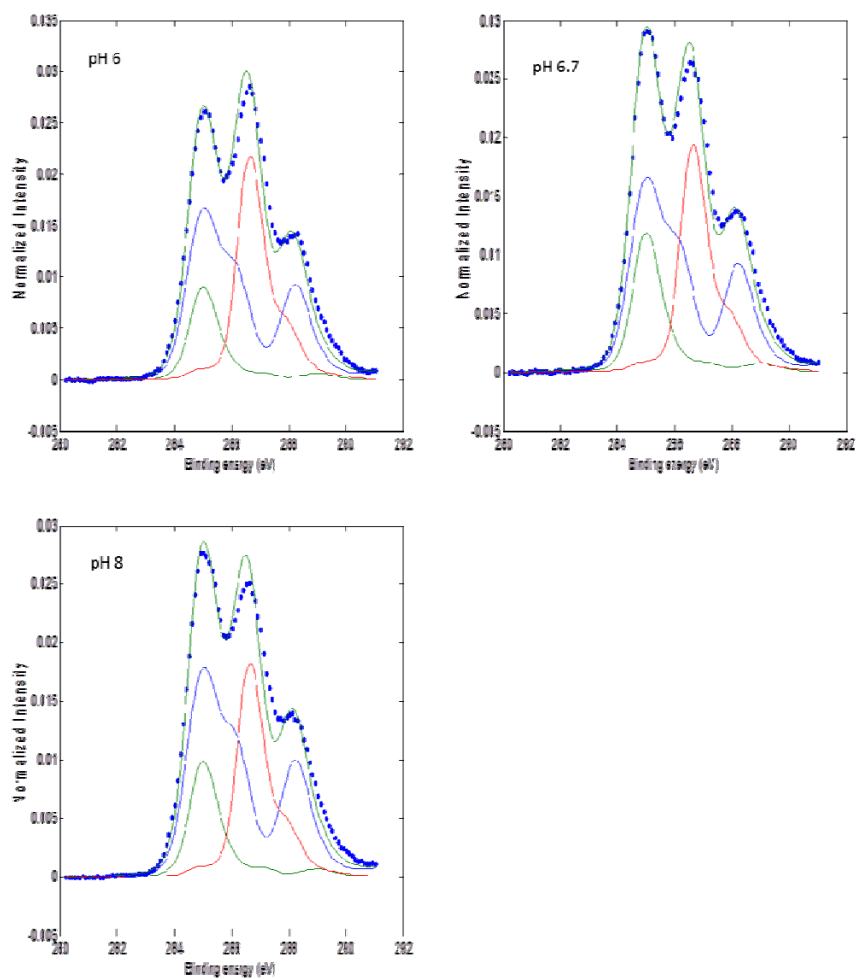

**Supplementary Figure 2.** Fit between data (dotted line) and multivariate model (solid line) for bacterial samples exposed to Zn(II) (data in Figure 6a). Blue represents peptide, red represents sugar (teichoic and teichuronic acids) and green represents lipid (lipoteichoic acids) component in the spectra.
